# Supplementary material for: Viral and host factors related to the clinical outcome of COVID-19
Source: Springer Nature journal article supplement (doi:10.1038/s41586-020-2355-0), 2020-05-20
Supplement: 41586_2020_2355_MOESM1_ESM.pdf [file 41586_2020_2355_MOESM1_ESM.pdf]

## Reporting Summary

Nature Research wishes to improve the reproducibility of the work that we publish. This form provides structure for consistency and transparency in reporting. For further information on Nature Research policies, see [Authors & Referees](#) and the [Editorial Policy Checklist](#).

### Statistics

For all statistical analyses, confirm that the following items are present in the figure legend, table legend, main text, or Methods section.

n/a Confirmed

- |                                     |                                     |                                                                                                                                                                                                                                                            |
|-------------------------------------|-------------------------------------|------------------------------------------------------------------------------------------------------------------------------------------------------------------------------------------------------------------------------------------------------------|
| <input type="checkbox"/>            | <input checked="" type="checkbox"/> | The exact sample size ( $n$ ) for each experimental group/condition, given as a discrete number and unit of measurement                                                                                                                                    |
| <input type="checkbox"/>            | <input checked="" type="checkbox"/> | A statement on whether measurements were taken from distinct samples or whether the same sample was measured repeatedly                                                                                                                                    |
| <input type="checkbox"/>            | <input checked="" type="checkbox"/> | The statistical test(s) used AND whether they are one- or two-sided<br><i>Only common tests should be described solely by name; describe more complex techniques in the Methods section.</i>                                                               |
| <input checked="" type="checkbox"/> | <input type="checkbox"/>            | A description of all covariates tested                                                                                                                                                                                                                     |
| <input type="checkbox"/>            | <input checked="" type="checkbox"/> | A description of any assumptions or corrections, such as tests of normality and adjustment for multiple comparisons                                                                                                                                        |
| <input type="checkbox"/>            | <input checked="" type="checkbox"/> | A full description of the statistical parameters including central tendency (e.g. means) or other basic estimates (e.g. regression coefficient) AND variation (e.g. standard deviation) or associated estimates of uncertainty (e.g. confidence intervals) |
| <input type="checkbox"/>            | <input checked="" type="checkbox"/> | For null hypothesis testing, the test statistic (e.g. $F$ , $t$ , $r$ ) with confidence intervals, effect sizes, degrees of freedom and $P$ value noted<br><i>Give <math>P</math> values as exact values whenever suitable.</i>                            |
| <input checked="" type="checkbox"/> | <input type="checkbox"/>            | For Bayesian analysis, information on the choice of priors and Markov chain Monte Carlo settings                                                                                                                                                           |
| <input checked="" type="checkbox"/> | <input type="checkbox"/>            | For hierarchical and complex designs, identification of the appropriate level for tests and full reporting of outcomes                                                                                                                                     |
| <input checked="" type="checkbox"/> | <input type="checkbox"/>            | Estimates of effect sizes (e.g. Cohen's $d$ , Pearson's $r$ ), indicating how they were calculated                                                                                                                                                         |

*Our web collection on [statistics for biologists](#) contains articles on many of the points above.*

### Software and code

Policy information about [availability of computer code](#)

|                 |                                                                                                                                                                                                                                                                                                                                |
|-----------------|--------------------------------------------------------------------------------------------------------------------------------------------------------------------------------------------------------------------------------------------------------------------------------------------------------------------------------|
| Data collection | Miseq control software (version 2.6.2.1)                                                                                                                                                                                                                                                                                       |
| Data analysis   | Trimomatic (version 0.39), BWA (version 0.7.17), Samtools (version 1.10), VirGenA (version 1.4), MAFFT (version 7.453), IQ-TREE (version 1.6.12), TreeTime (version 0.7.3), Nextstrain (version 1.15.0), R (version 3.6.2), ggplot2 (version 3.3.0), bcftools (version 1.9), Graphpad Prism (version 6), Medcalc (version 15). |

For manuscripts utilizing custom algorithms or software that are central to the research but not yet described in published literature, software must be made available to editors/reviewers. We strongly encourage code deposition in a community repository (e.g. GitHub). See the Nature Research [guidelines for submitting code & software](#) for further information.

### Data

Policy information about [availability of data](#)

All manuscripts must include a [data availability statement](#). This statement should provide the following information, where applicable:

- Accession codes, unique identifiers, or web links for publicly available datasets
- A list of figures that have associated raw data
- A description of any restrictions on data availability

The 94 genome sequences with over 90% coverage were deposited to GISAID (EPI\_ISL\_416316--EPI\_ISL\_416409). The phylogeny result is accessible via web address <http://ncov.linc.org.cn>. The amplicon sequencing reads for variant calling were deposited to NCBI Bioproject (PRJNA627662).

## Field-specific reporting

Please select the one below that is the best fit for your research. If you are not sure, read the appropriate sections before making your selection.

## Life sciences study design

All studies must disclose on these points even when the disclosure is negative.

|                 |                                                                                                                                                                                                                                                                                                                                                                                                                                                                                                                                                |
|-----------------|------------------------------------------------------------------------------------------------------------------------------------------------------------------------------------------------------------------------------------------------------------------------------------------------------------------------------------------------------------------------------------------------------------------------------------------------------------------------------------------------------------------------------------------------|
| Sample size     | A total of 326 patients, who were tested positive for SARS-CoV-2 RNA and were admitted into Shanghai Public Health Clinical Center from Jan 20th to Feb 25th were included. In addition to routine clinical tests, measurement of serum cytokine was performed on 228 patients. Phylogenetic analysis was performed on genome sequences (>90% complete) recovered from 94 patients. The sample size was determined by the maximum available clinical and laboratory information in our center. No prior sample size calculation was performed. |
| Data exclusions | No data excluded.                                                                                                                                                                                                                                                                                                                                                                                                                                                                                                                              |
| Replication     | All the clinical and immunological data was generated in laboratories within Shanghai Public Health Clinical Center which undertook regular quality controls and inter-laboratory consistency evaluations. All the genetic sequence data were generated using the standard practice of molecular biology and next generation sequencing standards. No experimental replication was performed for sequencing experiments and clinical measurements.                                                                                             |
| Randomization   | Participants were chosen randomly.                                                                                                                                                                                                                                                                                                                                                                                                                                                                                                             |
| Blinding        | The measurements were performed without prior knowledge of the participant groups.                                                                                                                                                                                                                                                                                                                                                                                                                                                             |

## Reporting for specific materials, systems and methods

We require information from authors about some types of materials, experimental systems and methods used in many studies. Here, indicate whether each material, system or method listed is relevant to your study. If you are not sure if a list item applies to your research, read the appropriate section before selecting a response.

### Materials & experimental systems

| n/a                                 | Involvement in the study                                        |
|-------------------------------------|-----------------------------------------------------------------|
| <input checked="" type="checkbox"/> | <input type="checkbox"/> Antibodies                             |
| <input checked="" type="checkbox"/> | <input type="checkbox"/> Eukaryotic cell lines                  |
| <input checked="" type="checkbox"/> | <input type="checkbox"/> Palaeontology                          |
| <input checked="" type="checkbox"/> | <input type="checkbox"/> Animals and other organisms            |
| <input type="checkbox"/>            | <input checked="" type="checkbox"/> Human research participants |
| <input checked="" type="checkbox"/> | <input type="checkbox"/> Clinical data                          |

### Methods

| n/a                                 | Involvement in the study                        |
|-------------------------------------|-------------------------------------------------|
| <input checked="" type="checkbox"/> | <input type="checkbox"/> ChIP-seq               |
| <input checked="" type="checkbox"/> | <input type="checkbox"/> Flow cytometry         |
| <input checked="" type="checkbox"/> | <input type="checkbox"/> MRI-based neuroimaging |

## Human research participants

Policy information about [studies involving human research participants](#)

|                            |                                                                                                                                                                                                                                                                                                                                                                                                                                                                                                                                                              |
|----------------------------|--------------------------------------------------------------------------------------------------------------------------------------------------------------------------------------------------------------------------------------------------------------------------------------------------------------------------------------------------------------------------------------------------------------------------------------------------------------------------------------------------------------------------------------------------------------|
| Population characteristics | A total of 326 patients, who were tested positive for SARS-CoV-2 RNA and were admitted into Shanghai Public Health Clinical Center from Jan 20th to Feb 25th. The median age of the patients was 51 years (range 15-88) with a male: female sex ratio of 1.10. 125 cases (38.34% had at least one co-morbidity, the most common were hypertension (76 cases), diabetes (24 cases), coronary heart disease (13 cases), chronic hepatitis B (10 cases), chronic obstructive pulmonary disease (2 cases), chronic renal disease (2 cases) and cancer (3 cases). |
| Recruitment                | All the available COVID-19 patients who were willing to participate in this study were recruited in this study. No self-selection bias existed to the best of our knowledge.                                                                                                                                                                                                                                                                                                                                                                                 |
| Ethics oversight           | The study was approved by the ethics committee of the Shanghai Public Health Clinical Center ( Approval No. YJ-2020-S015-01)                                                                                                                                                                                                                                                                                                                                                                                                                                 |

Note that full information on the approval of the study protocol must also be provided in the manuscript.
